# Supplementary material
Source: PubMed Central journal article supplement (PMC3184772)
Supplement: NIHMS319274-supplement-1_si_001.pdf [file NIHMS319274-supplement-1_si_001.pdf]

# An $n \rightarrow \pi^*$ Interaction in Aspirin: Implications for Structure and Reactivity

Amit Choudhary,<sup>†</sup> Kimberli J. Kamer,<sup>§</sup> and Ronald T. Raines<sup>\*,§,‡</sup>

<sup>†</sup>Graduate Program in Biophysics, <sup>§</sup>Department of Biochemistry, and <sup>‡</sup>Department of Chemistry,  
University of Wisconsin–Madison, Madison, Wisconsin 53706, United States

\*E-mail: rtraines@wisc.edu

| Page | Contents                                                                             |
|------|--------------------------------------------------------------------------------------|
| S1   | Table of Contents                                                                    |
| S2   | <b>Table S1.</b> SCF energies of <b>1–17</b>                                         |
| S3   | <b>Table S2.</b> Atomic coordinates of conformation <b>1</b>                         |
| S4   | <b>Table S3.</b> Atomic coordinates of conformation <b>2</b>                         |
| S5   | <b>Table S4.</b> Atomic coordinates of conformation <b>3</b>                         |
| S6   | <b>Table S5.</b> Atomic coordinates of conformation <b>4</b>                         |
| S7   | <b>Table S6.</b> Atomic coordinates of conformation <b>5</b>                         |
| S8   | <b>Table S7.</b> Atomic coordinates of conformation <b>6</b>                         |
| S9   | <b>Table S8.</b> Atomic coordinates of conformation <b>7</b>                         |
| S10  | <b>Table S9.</b> Atomic coordinates of conformation <b>8</b>                         |
| S11  | <b>Table S10.</b> Atomic coordinates of optimized conformation of compound <b>9</b>  |
| S12  | <b>Table S11.</b> Atomic coordinates of optimized conformation of compound <b>10</b> |
| S13  | <b>Table S12.</b> Atomic coordinates of optimized conformation of compound <b>11</b> |
| S14  | <b>Table S13.</b> Atomic coordinates of optimized conformation of compound <b>12</b> |
| S15  | <b>Table S14.</b> Atomic coordinates of optimized conformation of compound <b>13</b> |
| S16  | <b>Table S15.</b> Atomic coordinates of optimized conformation of compound <b>14</b> |
| S17  | <b>Table S16.</b> Atomic coordinates of optimized conformation of compound <b>15</b> |
| S18  | <b>Table S17.</b> Atomic coordinates of optimized conformation of compound <b>16</b> |
| S19  | <b>Table S17.</b> Atomic coordinates of optimized conformation of compound <b>17</b> |

**Table S1.** SCF energies (atomic units; au) of conformations **1–8** and compounds **9–17** calculated at B3LYP/6–311+g(2d,p) level of theory.

|           | Energy        | Zero-point correction | Energy (corrected) |
|-----------|---------------|-----------------------|--------------------|
| <b>1</b>  | –648.90486736 | 0.156289              | –648.74857836      |
| <b>2</b>  | –648.90352357 | 0.156276              | –648.74724757      |
| <b>3</b>  | –648.89968559 | 0.156511              | –648.74317459      |
| <b>4</b>  | –648.89608416 | 0.155933              | –648.74015116      |
| <b>5</b>  | –648.89632496 | 0.156233              | –648.74008996      |
| <b>6</b>  | –648.89602928 | 0.156205              | –648.73982428      |
| <b>7</b>  | –648.36068901 | 0.142654              | –648.21803501      |
| <b>8</b>  | –648.35897360 | 0.142703              | –648.21627060      |
| <b>9</b>  | –852.94412753 | 0.144945              | –852.79918253      |
| <b>10</b> | –740.64220400 | 0.141245              | –740.50095900      |
| <b>11</b> | –762.92065233 | 0.174901              | –762.74575133      |
| <b>12</b> | –782.36282729 | 0.215057              | –782.14777029      |
| <b>13</b> | –852.94527260 | 0.145006              | –852.80026660      |
| <b>14</b> | –740.64241835 | 0.141267              | –740.50115135      |
| <b>15</b> | –762.91909983 | 0.174853              | –762.74424683      |
| <b>16</b> | –782.36260440 | 0.214879              | –782.14772540      |
| <b>17</b> | –836.35529075 | 0.144033              | –836.21125775      |

**Table S2.** Atomic coordinates of conformation 1.

| Atom | <i>x</i>  | <i>y</i>  | <i>z</i>  |
|------|-----------|-----------|-----------|
| C    | -2.230697 | 0.489144  | 0.176517  |
| C    | -2.962483 | -0.687391 | 0.201165  |
| C    | -0.855930 | 0.485360  | -0.093807 |
| H    | -2.718526 | 1.434406  | 0.366055  |
| C    | -0.099142 | 1.762837  | -0.137471 |
| C    | -2.327725 | -1.899451 | -0.049511 |
| C    | -0.234591 | -0.749617 | -0.335898 |
| H    | -4.023695 | -0.658819 | 0.413737  |
| O    | 1.083083  | 1.890045  | -0.351962 |
| O    | -0.891156 | 2.843649  | 0.087939  |
| O    | 1.101854  | -0.843211 | -0.683006 |
| C    | -0.965978 | -1.927494 | -0.317353 |
| H    | -2.890459 | -2.825045 | -0.033993 |
| C    | 2.044167  | -0.690381 | 0.311725  |
| H    | -0.305871 | 3.615338  | 0.046459  |
| H    | -0.450355 | -2.858535 | -0.513895 |
| O    | 1.762207  | -0.639924 | 1.474003  |
| C    | 3.416660  | -0.612520 | -0.285295 |
| H    | 4.160962  | -0.709935 | 0.500991  |
| H    | 3.519900  | 0.359416  | -0.772337 |
| H    | 3.554458  | -1.384228 | -1.043246 |

**Table S3.** Atomic coordinates of conformation **2**.

| Atom | <i>x</i>  | <i>y</i>  | <i>z</i>  |
|------|-----------|-----------|-----------|
| C    | -2.271795 | 0.463516  | 0.171187  |
| C    | -2.967594 | -0.733188 | 0.188161  |
| C    | -0.897837 | 0.507663  | -0.097778 |
| H    | -2.773624 | 1.402021  | 0.364787  |
| C    | -0.280396 | 1.863683  | -0.095556 |
| C    | -2.293169 | -1.923849 | -0.064340 |
| C    | -0.237138 | -0.703773 | -0.342244 |
| H    | -4.029977 | -0.738613 | 0.396609  |
| O    | 1.019131  | 1.906301  | -0.473995 |
| O    | -0.879227 | 2.869506  | 0.203632  |
| O    | 1.109327  | -0.768613 | -0.679532 |
| C    | -0.930787 | -1.905417 | -0.327052 |
| H    | -2.824806 | -2.867696 | -0.054258 |
| C    | 2.037807  | -0.679596 | 0.329299  |
| H    | 1.276918  | 2.839668  | -0.410479 |
| H    | -0.385125 | -2.819375 | -0.523107 |
| O    | 1.745092  | -0.593803 | 1.487453  |
| C    | 3.424904  | -0.715952 | -0.243617 |
| H    | 4.151162  | -0.708845 | 0.564904  |
| H    | 3.571364  | 0.153713  | -0.886751 |
| H    | 3.555546  | -1.606519 | -0.860537 |

**Table S4.** Atomic coordinates of conformation **3**.

| Atom | <i>x</i>  | <i>y</i>  | <i>z</i>  |
|------|-----------|-----------|-----------|
| C    | -2.311983 | 0.354510  | 0.215422  |
| C    | -2.915244 | -0.891385 | 0.295300  |
| C    | -0.949110 | 0.481174  | -0.069469 |
| H    | -2.888511 | 1.257626  | 0.369410  |
| C    | -0.391394 | 1.878423  | -0.138249 |
| C    | -2.165352 | -2.039522 | 0.061189  |
| C    | -0.219417 | -0.682389 | -0.307102 |
| H    | -3.969723 | -0.966058 | 0.529490  |
| O    | -0.925122 | 2.745681  | -0.776107 |
| O    | 0.710006  | 2.131793  | 0.590569  |
| O    | 1.117224  | -0.649356 | -0.744713 |
| C    | -0.817654 | -1.932634 | -0.253346 |
| H    | -2.629201 | -3.016911 | 0.109855  |
| C    | 2.116775  | -0.544328 | 0.169039  |
| H    | 0.982928  | 1.349460  | 1.107091  |
| H    | -0.221848 | -2.809392 | -0.472923 |
| O    | 1.920709  | -0.281421 | 1.331179  |
| C    | 3.455362  | -0.772534 | -0.465519 |
| H    | 4.239145  | -0.601480 | 0.267264  |
| H    | 3.578705  | -0.100127 | -1.316103 |
| H    | 3.514067  | -1.794579 | -0.845104 |

**Table S5.** Atomic coordinates of conformation **4**.

| Atom | <i>x</i>  | <i>y</i>  | <i>z</i>  |
|------|-----------|-----------|-----------|
| C    | -2.146087 | 0.767709  | 0.053715  |
| C    | -3.056398 | -0.277969 | 0.138821  |
| C    | -0.784579 | 0.527239  | -0.151039 |
| H    | -2.500556 | 1.790586  | 0.109000  |
| C    | 0.165338  | 1.673484  | -0.326446 |
| C    | -2.607536 | -1.589056 | 0.035854  |
| C    | -0.354376 | -0.800118 | -0.254160 |
| H    | -4.109140 | -0.067981 | 0.279313  |
| O    | 1.009279  | 1.723573  | -1.178368 |
| O    | -0.006563 | 2.715368  | 0.525372  |
| O    | 0.965738  | -1.130601 | -0.513605 |
| C    | -1.255458 | -1.848642 | -0.153648 |
| H    | -3.307057 | -2.413053 | 0.104538  |
| C    | 1.939893  | -0.748729 | 0.379083  |
| H    | -0.586342 | 2.457515  | 1.254589  |
| H    | -0.883015 | -2.862231 | -0.228182 |
| O    | 1.695836  | -0.234913 | 1.434601  |
| C    | 3.298193  | -1.058791 | -0.172513 |
| H    | 4.041350  | -0.959409 | 0.614440  |
| H    | 3.512834  | -0.344318 | -0.971044 |
| H    | 3.323659  | -2.059281 | -0.604650 |

**Table S6.** Atomic coordinates of conformation **5**.

| Atom | <i>x</i>  | <i>y</i>  | <i>z</i>  |
|------|-----------|-----------|-----------|
| C    | -2.258754 | 0.193126  | 0.260423  |
| C    | -2.776570 | -1.092525 | 0.286744  |
| C    | -0.917611 | 0.425801  | -0.066810 |
| H    | -2.888341 | 1.038813  | 0.500676  |
| C    | -0.372302 | 1.808001  | -0.032595 |
| C    | -1.960316 | -2.170345 | -0.042537 |
| C    | -0.105711 | -0.671873 | -0.392010 |
| H    | -3.813660 | -1.252637 | 0.552941  |
| O    | 0.779013  | 2.105256  | 0.173752  |
| O    | -1.330923 | 2.746750  | -0.231089 |
| O    | 1.180934  | -0.505434 | -0.858874 |
| C    | -0.633626 | -1.958059 | -0.391903 |
| H    | -2.358889 | -3.177703 | -0.040108 |
| C    | 2.295481  | -0.474980 | -0.035112 |
| H    | -0.889397 | 3.607330  | -0.156870 |
| H    | 0.007592  | -2.779543 | -0.685731 |
| C    | 2.061075  | -0.629975 | 1.443133  |
| O    | 3.362737  | -0.349816 | -0.554103 |
| H    | 3.027948  | -0.655789 | 1.938621  |
| H    | 1.508722  | -1.545333 | 1.662247  |
| H    | 1.481931  | 0.215788  | 1.814743  |

**Table S7.** Atomic coordinates of conformation **6**.

| Atom | <i>x</i>  | <i>y</i>  | <i>z</i>  |
|------|-----------|-----------|-----------|
| C    | -2.280052 | 0.259052  | 0.253272  |
| C    | -2.821321 | -1.015536 | 0.265725  |
| C    | -0.934670 | 0.476002  | -0.068457 |
| H    | -2.886600 | 1.123193  | 0.490322  |
| C    | -0.475234 | 1.894573  | -0.053470 |
| C    | -2.022518 | -2.104651 | -0.071624 |
| C    | -0.141835 | -0.632955 | -0.400280 |
| H    | -3.862339 | -1.159628 | 0.525547  |
| O    | 0.862357  | 2.044147  | 0.067213  |
| O    | -1.223312 | 2.840507  | -0.109860 |
| O    | 1.156378  | -0.490965 | -0.853831 |
| C    | -0.691767 | -1.910566 | -0.413673 |
| H    | -2.437822 | -3.105190 | -0.081839 |
| C    | 2.256737  | -0.553807 | -0.021041 |
| H    | 1.037875  | 2.998447  | 0.052034  |
| H    | -0.064051 | -2.740109 | -0.714215 |
| C    | 2.000124  | -0.792846 | 1.443884  |
| O    | 3.337265  | -0.428885 | -0.515014 |
| H    | 2.958583  | -0.824245 | 1.954953  |
| H    | 1.469356  | -1.733688 | 1.599468  |
| H    | 1.386707  | 0.007187  | 1.859650  |



**Table S8.** Atomic coordinates of conformation 7.

| Atom | <i>x</i>  | <i>y</i>  | <i>z</i>  |
|------|-----------|-----------|-----------|
| C    | -2.196746 | 0.632637  | 0.251664  |
| C    | -2.993685 | -0.506199 | 0.252234  |
| C    | -0.831674 | 0.585713  | -0.044928 |
| H    | -2.610664 | 1.610520  | 0.465385  |
| C    | -0.012091 | 1.905402  | -0.015701 |
| C    | -2.438299 | -1.740617 | -0.075482 |
| C    | -0.304934 | -0.668545 | -0.361333 |
| H    | -4.048276 | -0.431687 | 0.497626  |
| O    | 1.219002  | 1.785958  | 0.188221  |
| O    | -0.686267 | 2.942654  | -0.183665 |
| O    | 1.027514  | -0.789157 | -0.767196 |
| C    | -1.086998 | -1.816542 | -0.389942 |
| H    | -3.049337 | -2.636972 | -0.088113 |
| C    | 1.988878  | -0.816689 | 0.203779  |
| H    | -0.622140 | -2.758802 | -0.655521 |
| O    | 1.791741  | -1.183691 | 1.331655  |
| C    | 3.316684  | -0.404334 | -0.364727 |
| H    | 4.118014  | -0.712931 | 0.304490  |
| H    | 3.287546  | 0.683955  | -0.448066 |
| H    | 3.462132  | -0.825152 | -1.361306 |

**Table S9.** Atomic coordinates of conformation **8**.

| Atom | <i>x</i>  | <i>y</i>  | <i>z</i>  |
|------|-----------|-----------|-----------|
| C    | 0.000000  | 0.000000  | 0.000000  |
| C    | 1.389009  | 0.000000  | 0.000000  |
| C    | -0.746117 | 1.184206  | 0.000000  |
| H    | -0.549889 | -0.933628 | -0.016878 |
| C    | -2.287042 | 1.084120  | 0.049157  |
| C    | 2.081690  | 1.208189  | -0.039212 |
| C    | -0.025788 | 2.379219  | -0.025950 |
| H    | 1.932056  | -0.939333 | 0.013289  |
| O    | -2.833274 | 1.719614  | 0.981052  |
| O    | -2.789772 | 0.343684  | -0.816954 |
| O    | -0.665625 | 3.619801  | -0.141902 |
| C    | 1.366192  | 2.398429  | -0.068037 |
| H    | 3.165815  | 1.225544  | -0.061698 |
| C    | -1.040858 | 4.355567  | 0.945599  |
| H    | 1.872177  | 3.355258  | -0.131833 |
| C    | -0.903677 | 3.713009  | 2.296929  |
| O    | -1.463267 | 5.468065  | 0.756797  |
| H    | -1.176046 | 4.443367  | 3.055692  |
| H    | 0.113627  | 3.354627  | 2.465453  |
| H    | -1.582478 | 2.852485  | 2.310950  |

**Table S10.** Atomic coordinates of optimized conformation of compound **9**.

| Atom | x         | y         | z         |
|------|-----------|-----------|-----------|
| C    | -1.215153 | 0.799875  | 0.017767  |
| C    | -2.076158 | -0.288944 | -0.040507 |
| C    | 0.155723  | 0.636489  | -0.169605 |
| H    | -1.585247 | 1.801036  | 0.185809  |
| C    | 1.068265  | 1.897439  | -0.109775 |
| C    | -1.614982 | -1.574323 | -0.318228 |
| C    | 0.609006  | -0.660753 | -0.430788 |
| O    | 0.473964  | 2.971073  | -0.317241 |
| O    | 1.943646  | -0.900531 | -0.713946 |
| C    | -0.259450 | -1.748477 | -0.519142 |
| H    | -2.309275 | -2.399952 | -0.368019 |
| C    | 2.832935  | -0.899494 | 0.340098  |
| H    | 0.150648  | -2.726385 | -0.738196 |
| O    | 2.514505  | -1.170714 | 1.464205  |
| C    | 4.223517  | -0.628638 | -0.151536 |
| H    | 4.944995  | -0.921484 | 0.608854  |
| H    | 4.283269  | 0.444825  | -0.338375 |
| H    | 4.413853  | -1.157489 | -1.087176 |
| N    | -3.509997 | -0.090964 | 0.175511  |
| O    | -4.255622 | -1.067698 | 0.058344  |
| O    | -3.910485 | 1.033499  | 0.462862  |

**Table S11.** Atomic coordinates of optimized conformation of compound **10**.

| Atom | <i>x</i>  | <i>y</i>  | <i>z</i>  |
|------|-----------|-----------|-----------|
| C    | -1.575317 | 0.765315  | 0.062602  |
| C    | -2.440084 | -0.332119 | 0.002516  |
| C    | -0.203552 | 0.632372  | -0.140532 |
| H    | -1.948709 | 1.763851  | 0.250313  |
| C    | 0.684796  | 1.909637  | -0.058567 |
| C    | -1.933480 | -1.604595 | -0.297293 |
| C    | 0.270845  | -0.650731 | -0.427324 |
| O    | 1.897653  | 1.715896  | 0.182360  |
| O    | 0.067183  | 2.977092  | -0.233078 |
| O    | 1.608898  | -0.856880 | -0.735628 |
| C    | -0.576446 | -1.752033 | -0.517394 |
| H    | -2.599765 | -2.456230 | -0.354067 |
| C    | 2.507557  | -0.882817 | 0.305983  |
| H    | -0.151564 | -2.719285 | -0.755542 |
| O    | 2.207226  | -1.193105 | 1.425645  |
| C    | 3.888814  | -0.571130 | -0.189056 |
| C    | -3.843632 | -0.167724 | 0.228919  |
| N    | -4.979161 | -0.054308 | 0.407882  |
| H    | 3.929908  | 0.510638  | -0.328228 |
| H    | 4.624052  | -0.886363 | 0.548947  |
| H    | 4.075511  | -1.053514 | -1.150118 |

**Table S12.** Atomic coordinates of optimized conformation of compound **11**.

| Atom | <i>x</i>  | <i>y</i>  | <i>z</i>  |
|------|-----------|-----------|-----------|
| C    | -1.531899 | 0.528247  | 0.001271  |
| C    | -2.276583 | -0.643060 | -0.037139 |
| C    | -0.144484 | 0.524561  | -0.181019 |
| H    | -1.975308 | 1.503061  | 0.149847  |
| C    | 0.595958  | 1.893113  | -0.115494 |
| C    | -1.645045 | -1.862240 | -0.282468 |
| C    | 0.464725  | -0.706292 | -0.417558 |
| O    | 1.832002  | 1.845348  | 0.079498  |
| O    | -0.141657 | 2.892411  | -0.252444 |
| O    | 1.830744  | -0.787555 | -0.709656 |
| C    | -0.272884 | -1.883126 | -0.475635 |
| H    | -2.233607 | -2.771262 | -0.318045 |
| C    | 2.708952  | -0.715217 | 0.332674  |
| H    | 0.243746  | -2.815249 | -0.672364 |
| O    | 2.434571  | -1.012501 | 1.465212  |
| C    | 4.063954  | -0.288038 | -0.156252 |
| H    | 4.818379  | -0.517988 | 0.594168  |
| H    | 4.004026  | 0.790075  | -0.317768 |
| H    | 4.305279  | -0.768320 | -1.106245 |
| C    | -4.316401 | 0.518594  | 0.403224  |
| H    | -5.368769 | 0.262774  | 0.527098  |
| H    | -3.947481 | 0.996061  | 1.316930  |
| H    | -4.208513 | 1.223189  | -0.427919 |
| O    | -3.645099 | -0.700403 | 0.145475  |

**Table S13.** Atomic coordinates of optimized conformation of compound **12**.

| Atom | <i>x</i>  | <i>y</i>  | <i>z</i>  |
|------|-----------|-----------|-----------|
| C    | -1.112001 | 0.792822  | 0.150127  |
| C    | -2.016272 | -0.272829 | 0.062474  |
| C    | 0.250482  | 0.657308  | -0.091666 |
| H    | -1.438831 | 1.790166  | 0.413877  |
| C    | 1.150343  | 1.919690  | 0.045662  |
| C    | -1.516024 | -1.528403 | -0.299561 |
| C    | 0.712225  | -0.617304 | -0.438470 |
| O    | 2.367830  | 1.708973  | 0.253755  |
| O    | 0.545362  | 3.007967  | -0.053829 |
| O    | 2.051266  | -0.819752 | -0.788971 |
| C    | -0.154234 | -1.689219 | -0.544452 |
| H    | -2.167504 | -2.385806 | -0.400574 |
| C    | 2.959870  | -0.949379 | 0.221608  |
| H    | 0.241091  | -2.657783 | -0.828123 |
| O    | 2.685123  | -1.333740 | 1.327540  |
| C    | 4.339413  | -0.616862 | -0.272078 |
| H    | 4.390893  | 0.472761  | -0.320697 |
| H    | 5.084761  | -1.001760 | 0.421894  |
| H    | 4.502024  | -1.016822 | -1.274632 |
| C    | -4.247332 | -1.226769 | 0.399326  |
| C    | -4.030548 | 1.067446  | -0.294612 |
| H    | -3.826322 | -1.990206 | 1.055024  |
| H    | -5.223025 | -0.938660 | 0.798170  |
| H    | -4.412712 | -1.680476 | -0.595475 |
| H    | -3.402729 | 1.952627  | -0.242475 |
| H    | -4.239871 | 0.860819  | -1.359082 |
| H    | -4.978152 | 1.292210  | 0.202512  |
| N    | -3.391689 | -0.060524 | 0.370211  |

**Table S14.** Atomic coordinates of optimized conformation of compound **13**.

| Atom | <i>x</i>  | <i>y</i>  | <i>z</i>  |
|------|-----------|-----------|-----------|
| C    | -0.569861 | 1.911937  | 0.301640  |
| C    | 0.537251  | 1.123484  | -0.032247 |
| H    | -0.388419 | 2.956083  | 0.522516  |
| C    | 1.948902  | 1.750682  | -0.032421 |
| C    | -2.049373 | 0.066056  | -0.030395 |
| C    | 0.293586  | -0.213787 | -0.364938 |
| O    | 2.850473  | 1.038362  | 0.461184  |
| O    | 1.999858  | 2.900283  | -0.510333 |
| O    | 1.358867  | -1.011184 | -0.775102 |
| C    | -0.979461 | -0.751331 | -0.382573 |
| C    | 2.072375  | -1.661216 | 0.202804  |
| H    | -1.141214 | -1.783251 | -0.655687 |
| O    | 1.619126  | -1.941467 | 1.277771  |
| C    | 3.447472  | -1.992589 | -0.295493 |
| N    | -3.396421 | -0.486580 | -0.039852 |
| O    | -4.329547 | 0.241806  | 0.305905  |
| O    | -3.548642 | -1.657363 | -0.393571 |
| H    | 3.905815  | -2.738681 | 0.350547  |
| H    | 3.414433  | -2.341517 | -1.328711 |
| H    | 4.016866  | -1.060681 | -0.263993 |
| C    | -1.855411 | 1.400099  | 0.323447  |
| H    | -2.706490 | 2.010597  | 0.588521  |

**Table S15.** Atomic coordinates of optimized conformation of compound **14**.

| Atom | <i>x</i>  | <i>y</i>  | <i>z</i>  |
|------|-----------|-----------|-----------|
| C    | -0.993933 | 1.801677  | 0.300323  |
| C    | 0.149819  | 1.066925  | -0.026706 |
| H    | -0.853409 | 2.852056  | 0.522446  |
| C    | 1.529600  | 1.776735  | -0.013326 |
| C    | -2.411584 | -0.115280 | -0.034769 |
| C    | -0.034653 | -0.277634 | -0.362126 |
| O    | 2.502907  | 1.061525  | 0.313021  |
| O    | 1.487601  | 2.985900  | -0.312938 |
| O    | 1.051268  | -1.039515 | -0.785756 |
| C    | -1.285970 | -0.869713 | -0.381532 |
| C    | 1.839450  | -1.609636 | 0.183918  |
| H    | -1.380726 | -1.910697 | -0.661248 |
| O    | 1.446121  | -1.870471 | 1.287480  |
| C    | 3.204364  | -1.903494 | -0.364196 |
| H    | 3.723464  | -2.600949 | 0.290364  |
| H    | 3.139633  | -2.299854 | -1.378858 |
| H    | 3.732347  | -0.948124 | -0.398313 |
| C    | -3.709204 | -0.714291 | -0.046639 |
| N    | -4.761157 | -1.192046 | -0.056399 |
| C    | -2.256203 | 1.233250  | 0.315834  |
| H    | -3.126500 | 1.821142  | 0.581254  |



**Table S16.** Atomic coordinates of optimized conformation of compound **15**.

| Atom | <i>x</i>  | <i>y</i>  | <i>z</i>  |
|------|-----------|-----------|-----------|
| C    | -0.975221 | 1.643863  | 0.192507  |
| C    | 0.229547  | 0.996597  | -0.067747 |
| H    | -0.912085 | 2.707335  | 0.388285  |
| C    | 1.542399  | 1.827623  | -0.049696 |
| C    | -2.253678 | -0.365933 | -0.104590 |
| C    | 0.137623  | -0.372282 | -0.348447 |
| O    | 2.613852  | 1.176115  | -0.022836 |
| O    | 1.379717  | 3.065827  | -0.057732 |
| O    | 1.264778  | -1.106266 | -0.718295 |
| C    | -1.072146 | -1.048160 | -0.377558 |
| C    | 2.165415  | -1.431674 | 0.259719  |
| H    | -1.096636 | -2.105542 | -0.607776 |
| O    | 1.876453  | -1.548393 | 1.420538  |
| C    | 3.511326  | -1.715783 | -0.343703 |
| C    | -4.628210 | -0.470554 | 0.135624  |
| H    | -5.404250 | -1.231577 | 0.055003  |
| H    | -4.636159 | -0.054173 | 1.149306  |
| H    | -4.837465 | 0.334007  | -0.578723 |
| O    | -3.408613 | -1.120976 | -0.152144 |
| H    | 3.956548  | -0.745716 | -0.571187 |
| H    | 4.128362  | -2.258513 | 0.370370  |
| H    | 3.409659  | -2.280577 | -1.272341 |
| C    | -2.208555 | 0.994424  | 0.188565  |
| H    | -3.108471 | 1.555578  | 0.402762  |

**Table S17.** Atomic coordinates of optimized conformation of compound **16**.

| Atom | <i>x</i>  | <i>y</i>  | <i>z</i>  |
|------|-----------|-----------|-----------|
| C    | -0.480649 | 1.864193  | 0.158862  |
| C    | 0.631131  | 1.066262  | -0.097571 |
| H    | -0.292502 | 2.925827  | 0.264107  |
| C    | 2.029459  | 1.732849  | -0.201864 |
| C    | -2.015916 | -0.006222 | 0.072395  |
| C    | 0.365648  | -0.297441 | -0.261799 |
| O    | 3.018750  | 0.961976  | -0.162782 |
| O    | 2.011705  | 2.977071  | -0.308869 |
| O    | 1.382062  | -1.190632 | -0.607620 |
| C    | -0.912265 | -0.827399 | -0.183196 |
| C    | 2.286517  | -1.537439 | 0.359031  |
| H    | -1.024352 | -1.898327 | -0.293240 |
| O    | 2.043917  | -1.523351 | 1.536268  |
| C    | 3.559516  | -2.029931 | -0.268868 |
| H    | 4.102142  | -1.143087 | -0.600433 |
| H    | 4.144446  | -2.579722 | 0.466563  |
| H    | 3.347704  | -2.655904 | -1.137916 |
| C    | -3.734038 | -1.437297 | -0.915353 |
| C    | -4.381318 | 0.289051  | 0.630900  |
| H    | -2.948621 | -2.140424 | -1.180864 |
| H    | -4.614848 | -2.011648 | -0.615418 |
| H    | -3.991399 | -0.858357 | -1.819819 |
| H    | -4.096321 | 0.793456  | 1.554506  |
| H    | -4.659946 | 1.058773  | -0.110630 |
| H    | -5.268725 | -0.315872 | 0.832679  |
| N    | -3.313375 | -0.583734 | 0.186969  |
| C    | -1.775493 | 1.360866  | 0.247062  |
| H    | -2.590965 | 2.045962  | 0.438112  |

**Table S18.** Atomic coordinates of optimized conformation of compound **17**.

| Atom | <i>x</i>  | <i>y</i>  | <i>z</i>  |
|------|-----------|-----------|-----------|
| C    | -1.741024 | -1.925407 | 0.223761  |
| C    | -0.703737 | -2.838452 | 0.372452  |
| C    | -1.484517 | -0.576096 | -0.024612 |
| H    | -2.778740 | -2.233734 | 0.279116  |
| C    | -2.698659 | 0.383130  | -0.154820 |
| C    | 0.613841  | -2.420846 | 0.225244  |
| C    | -0.142547 | -0.191715 | -0.148233 |
| H    | -0.923130 | -3.882688 | 0.585785  |
| O    | -2.601018 | 1.505650  | 0.386957  |
| O    | -3.682774 | -0.102676 | -0.772297 |
| O    | 0.099015  | 1.140927  | -0.492899 |
| C    | 0.933594  | -1.091906 | -0.063195 |
| H    | 1.446940  | -3.106992 | 0.315739  |
| C    | 0.676776  | 1.964723  | 0.390798  |
| O    | 0.876004  | 1.731868  | 1.557190  |
| C    | 1.048987  | 3.255678  | -0.297904 |
| H    | 1.330203  | 4.000615  | 0.445510  |
| H    | 0.215230  | 3.614389  | -0.903784 |
| H    | 1.895852  | 3.038198  | -0.952802 |
| C    | 2.439223  | -0.754253 | -0.309092 |
| O    | 2.710414  | 0.359667  | -0.815887 |
| O    | 3.243612  | -1.667802 | 0.004941  |
